# Supplementary material for: Partial reactivation of a huge deep-seated ancient rock slide: recognition, formation mechanism, and stability
Source: Copernicus journal article supplement (doi:10.5194/nhess-16-1719-2016), 2016-08-01
Supplement: Supplementary file 1 [file nhess-16-1719-2016-supplement.zip]

## Supplement 1

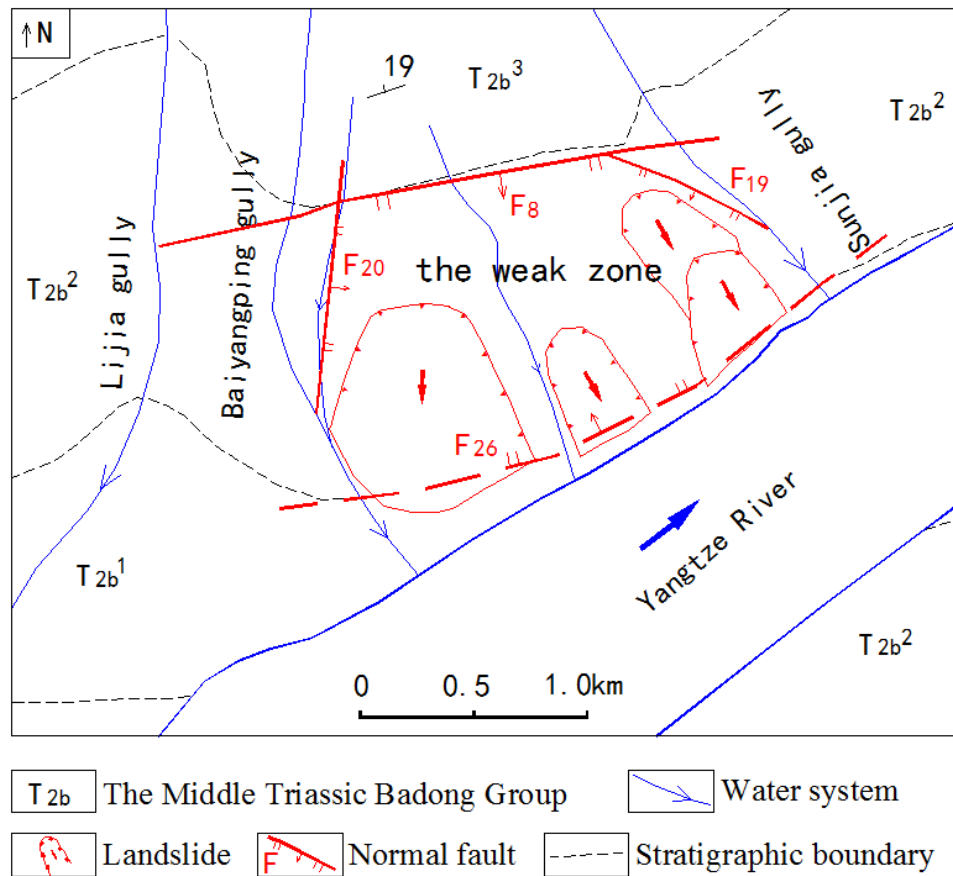

**Supplement 1.** Some authors (BIS-CWRC, 1997, 1999) suggested that the weak zone was caused by geological tectonic activity, as the slope area is surrounded by four normal faults, due to the formation of a local fault graben.
