# Supplementary material for: Partial reactivation of a huge deep-seated ancient rock slide: recognition, formation mechanism, and stability
Source: Copernicus journal article supplement (doi:10.5194/nhess-16-1719-2016), 2016-08-01
Supplement: Supplementary file 2 [file nhess-16-1719-2016-supplement.zip]

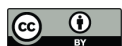

## *Supplement of*

# **Partial reactivation of a huge deep-seated ancient rock slide: recognition, formation mechanism, and stability**

**Minggao Tang et al.**

*Correspondence to:* Qiang Xu (xq@cdut.edu.cn)

- nhess-16-1719-2016-supplement-title-page.pdf
- Supplement 1.pdf
- Supplement 2 Failure progress.gif

The copyright of individual parts of the supplement might differ from the CC-BY 3.0 licence.
